# Supplementary material for: Binuclear homoleptic rhodium carbonyls: Structures, energetics, and vibrational spectra
Source: Royal Society of Chemistry journal article supplement (doi:10.1039/b814580f), 2009-01-01
Supplement: b814580f.pdf [file b814580f.pdf]

# Binuclear Homoleptic Rhodium Carbonyls: Structures, Energetics, and Vibrational Spectra

Xuejun Feng,<sup>a\*</sup> Chanyuan Xie,<sup>a</sup> Zhaohui Liu, Yaoming Xie,<sup>b</sup> R. Bruce King,<sup>b\*</sup> and  
Henry F. Schaefer III<sup>b</sup>

<sup>a</sup>*School of Chemical and Material Engineering, Jiangnan University, Wuxi 214122, P. R.  
China,*

<sup>b</sup>*Center for Computational Chemistry and Department of Chemistry, University of  
Georgia, Athens, Georgia 30602*

## Supporting Information

**Tables S1 to S23.** The harmonic vibrational frequencies (in  $\text{cm}^{-1}$ ) and their infrared intensities (in  $\text{km/mol}$ ) for the  $\text{Rh}_2(\text{CO})_n$  ( $n = 8, 7, 6, 5$ ) derivatives.

**Table S24.** Coordinates of the optimized  $\text{Rh}_2(\text{CO})_n$  ( $n = 8, 7, 6, 5$ ) structures using the B3LYP method.

The complete Gaussian 03 reference (reference 39).

The complete MOLPRO reference (Reference 42).

**Table S1.** The harmonic vibrational frequencies (in  $\text{cm}^{-1}$ ) and their IR intensities (in  $\text{km/mol}$ ) for  $\text{Rh}_2(\text{CO})_8$  (**8S-1**).

|                | B3LYP       | BP86        | MPW1PW91    |
|----------------|-------------|-------------|-------------|
| a <sub>1</sub> | 35 (0)      | 35 (0)      | 37 (0)      |
|                | 60 (0)      | 60 (0)      | 62 (0)      |
|                | 74 (0)      | 72 (0)      | 75 (0)      |
|                | 97 (1)      | 95 (0)      | 98 (0)      |
|                | 186 (0)     | 181 (0)     | 198 (0)     |
|                | 293 (16)    | 298 (9)     | 311 (16)    |
|                | 345 (3)     | 355 (3)     | 368 (5)     |
|                | 362 (31)    | 396 (26)    | 392 (30)    |
|                | 404 (1)     | 415 (1)     | 424 (1)     |
|                | 460 (3)     | 455 (1)     | 474 (3)     |
|                | 485 (2)     | 489 (1)     | 502 (1)     |
|                | 547 (54)    | 531 (60)    | 563 (61)    |
|                | 1931 (273)  | 1868 (232)  | 1973 (292)  |
|                | 2110 (1696) | 2020 (1528) | 2153 (1686) |
| 2166 (41)      | 2075 (44)   | 2210 (40)   |             |
| a <sub>2</sub> | 31 (0)      | 30 (0)      | 32 (0)      |
|                | 56 (0)      | 55 (0)      | 57 (0)      |
|                | 79 (0)      | 77 (0)      | 81 (0)      |
|                | 194 (0)     | 195 (0)     | 209 (0)     |
|                | 281 (0)     | 283 (0)     | 295 (0)     |
|                | 310 (0)     | 308 (0)     | 323 (0)     |
|                | 366 (0)     | 388 (0)     | 389 (0)     |
|                | 409 (0)     | 408 (0)     | 425 (0)     |
|                | 540 (0)     | 537 (0)     | 560 (0)     |
|                | 2102 (0)    | 2012 (0)    | 2145 (0)    |
| b <sub>1</sub> | 37 (0)      | 35 (0)      | 37 (0)      |
|                | 64 (0)      | 64 (0)      | 66 (0)      |
|                | 81 (0)      | 78 (0)      | 83 (0)      |
|                | 287 (1)     | 285 (0)     | 301 (1)     |
|                | 311 (14)    | 313 (7)     | 330 (10)    |
|                | 356 (67)    | 378 (69)    | 378 (73)    |
|                | 405 (13)    | 396 (2)     | 422 (14)    |
|                | 423 (31)    | 427 (36)    | 441 (33)    |
|                | 528 (29)    | 515 (27)    | 543 (34)    |
|                | 1917 (926)  | 1860 (719)  | 1959 (926)  |
| 2109 (1444)    | 2019 (1298) | 2153 (1422) |             |
| b <sub>2</sub> | 63 (0)      | 63 (0)      | 64 (0)      |
|                | 74 (0)      | 72 (0)      | 75 (0)      |
|                | 88 (0)      | 86 (0)      | 90 (0)      |
|                | 220 (11)    | 218 (9)     | 230 (9)     |
|                | 292 (37)    | 294 (32)    | 309 (39)    |
|                | 351 (29)    | 387 (1)     | 381 (15)    |

|      |        |      |        |      |        |
|------|--------|------|--------|------|--------|
| 368  | (21)   | 393  | (47)   | 388  | (37)   |
| 459  | (82)   | 453  | (65)   | 473  | (82)   |
| 480  | (75)   | 487  | (109)  | 497  | (84)   |
| 642  | (540)  | 621  | (478)  | 669  | (578)  |
| 2103 | (66)   | 2012 | (101)  | 2146 | (65)   |
| 2132 | (1509) | 2042 | (1352) | 2175 | (1450) |

**Table S2.** The harmonic vibrational frequencies (in  $\text{cm}^{-1}$ ) and their IR intensities (in  $\text{km/mol}$ ) for  $\text{Rh}_2(\text{CO})_8$  (**8S-2**).

|                | B3LYP       | BP86        | MPW1PW91    |
|----------------|-------------|-------------|-------------|
| a <sub>1</sub> | 49 (0)      | 52 (0)      | 52 (0)      |
|                | 90 (0)      | 90 (0)      | 95 (0)      |
|                | 151 (0)     | 151 (0)     | 167 (0)     |
|                | 378 (0)     | 405 (0)     | 403 (0)     |
|                | 442 (0)     | 449 (0)     | 462 (0)     |
|                | 471 (0)     | 477 (0)     | 489 (0)     |
|                | 541 (0)     | 526 (0)     | 556 (0)     |
|                | 2083 (0)    | 1999 (0)    | 2127 (0)    |
|                | 2166 (0)    | 2078 (0)    | 2210 (0)    |
| a <sub>2</sub> | 76 (0)      | 73 (0)      | 76 (0)      |
|                | 290 (0)     | 285 (0)     | 301 (0)     |
|                | 473 (0)     | 466 (0)     | 489 (0)     |
| b <sub>1</sub> | 24 (0)      | 25 (0)      | 25 (0)      |
|                | 77 (0)      | 75 (0)      | 78 (0)      |
|                | 294 (0)     | 290 (0)     | 306 (0)     |
|                | 467 (0)     | 458 (0)     | 482 (0)     |
| b <sub>2</sub> | 54 (1)      | 57 (1)      | 57 (1)      |
|                | 104 (7)     | 102 (6)     | 109 (9)     |
|                | 375 (5)     | 397 (5)     | 398 (2)     |
|                | 423 (229)   | 432 (227)   | 436 (249)   |
|                | 450 (68)    | 456 (78)    | 473 (59)    |
|                | 510 (389)   | 509 (303)   | 527 (397)   |
|                | 2091 (345)  | 2007 (598)  | 2135 (340)  |
|                | 2112 (1298) | 2032 (881)  | 2155 (1270) |
| e              | 32 (0)      | 33 (0)      | 34 (0)      |
|                | 54 (1)      | 48 (1)      | 55 (1)      |
|                | 82 (0)      | 80 (0)      | 85 (0)      |
|                | 85 (0)      | 83 (0)      | 87 (0)      |
|                | 266 (2)     | 265 (0)     | 282 (1)     |
|                | 316 (0)     | 306 (0)     | 327 (0)     |
|                | 384 (2)     | 407 (0)     | 407 (2)     |
|                | 421 (27)    | 434 (15)    | 444 (24)    |
|                | 465 (61)    | 456 (65)    | 480 (71)    |
|                | 520 (31)    | 506 (29)    | 536 (34)    |
|                | 2068 (166)  | 1986 (129)  | 2110 (201)  |
|                | 2095 (2014) | 2010 (1714) | 2139 (1938) |

**Table S3.** The harmonic vibrational frequencies (in  $\text{cm}^{-1}$ ) and their IR intensities (in  $\text{km/mol}$ ) for  $\text{Rh}_2(\text{CO})_8$  (**8S-3**).

|          | B3LYP |        | BP86 |        | MPW1PW91 |        |
|----------|-------|--------|------|--------|----------|--------|
| $a_{1g}$ | 84    | (0)    | 82   | (0)    | 87       | (0)    |
|          | 147   | (0)    | 147  | (0)    | 162      | (0)    |
|          | 390   | (0)    | 406  | (0)    | 411      | (0)    |
|          | 432   | (0)    | 455  | (0)    | 457      | (0)    |
|          | 500   | (0)    | 496  | (0)    | 519      | (0)    |
|          | 2102  | (0)    | 2017 | (0)    | 2145     | (0)    |
|          | 2166  | (0)    | 2078 | (0)    | 2209     | (0)    |
| $a_{1u}$ | 42    | (0)    | 42   | (0)    | 43       | (0)    |
|          | 296   | (0)    | 289  | (0)    | 310      | (0)    |
| $a_{2g}$ | 294   | (0)    | 289  | (0)    | 306      | (0)    |
| $a_{2u}$ | 92    | (1)    | 91   | (1)    | 95       | (2)    |
|          | 368   | (45)   | 388  | (48)   | 388      | (53)   |
|          | 425   | (6)    | 443  | (34)   | 447      | (17)   |
|          | 474   | (315)  | 479  | (251)  | 494      | (320)  |
|          | 2076  | (109)  | 1992 | (139)  | 2119     | (122)  |
|          | 2137  | (1548) | 2054 | (1237) | 2181     | (1516) |
|          | $e_g$ | 52     | (0)  | 51     | (0)      | 54     |
| 73       |       | (0)    | 68   | (0)    | 73       | (0)    |
| 84       |       | (0)    | 82   | (0)    | 86       | (0)    |
| 292      |       | (0)    | 302  | (0)    | 311      | (0)    |
| 358      |       | (0)    | 361  | (0)    | 377      | (0)    |
| 456      |       | (0)    | 457  | (0)    | 475      | (0)    |
| 508      |       | (0)    | 504  | (0)    | 527      | (0)    |
| 2074     |       | (0)    | 1989 | (0)    | 2115     | (0)    |
| $e_u$    | 32    | (0)    | 30   | (0)    | 33       | (0)    |
|          | 72    | (0)    | 71   | (0)    | 74       | (0)    |
|          | 85    | (0)    | 83   | (0)    | 87       | (0)    |
|          | 293   | (40)   | 307  | (17)   | 312      | (35)   |
|          | 372   | (48)   | 378  | (51)   | 395      | (54)   |
|          | 453   | (0)    | 452  | (3)    | 472      | (0)    |
|          | 507   | (62)   | 502  | (64)   | 525      | (71)   |
|          | 2087  | (1971) | 2002 | (1722) | 2129     | (1945) |

**Table S4.** The harmonic vibrational frequencies (in  $\text{cm}^{-1}$ ) and their IR intensities (in  $\text{km/mol}$ ) for  $\text{Rh}_2(\text{CO})_7$  (**7S-1**)

|                | B3LYP       | BP86        | MPW1PW91    |
|----------------|-------------|-------------|-------------|
| a <sub>1</sub> | 51 (0)      | 53 (0)      | 54 (0)      |
|                | 82 (1)      | 80 (1)      | 85 (1)      |
|                | 94 (4)      | 91 (4)      | 96 (5)      |
|                | 159 (0)     | 161 (0)     | 173 (0)     |
|                | 372 (15)    | 399 (1)     | 398 (13)    |
|                | 426 (51)    | 434 (120)   | 441 (75)    |
|                | 443 (1)     | 452 (10)    | 460 (4)     |
|                | 448 (9)     | 459 (41)    | 467 (18)    |
|                | 456 (61)    | 463 (15)    | 475 (54)    |
|                | 499 (394)   | 495 (255)   | 514 (378)   |
|                | 545 (16)    | 530 (33)    | 560 (21)    |
|                | 2078 (392)  | 1994 (438)  | 2120 (397)  |
|                | 2098 (563)  | 2014 (587)  | 2142 (656)  |
|                | 2119 (823)  | 2036 (569)  | 2162 (777)  |
| 2170 (47)      | 2083 (47)   | 2216 (51)   |             |
| a <sub>2</sub> | 27 (0)      | 29 (0)      | 29 (0)      |
|                | 73 (0)      | 70 (0)      | 74 (0)      |
|                | 281 (0)     | 277 (0)     | 298 (0)     |
|                | 329 (0)     | 320 (0)     | 339 (0)     |
|                | 467 (0)     | 461 (0)     | 484 (0)     |
| b <sub>1</sub> | 31 (0)      | 15i (0)     | 31 (0)      |
|                | 50 (0)      | 46 (0)      | 51 (0)      |
|                | 61 (0)      | 52 (1)      | 61 (0)      |
|                | 78 (0)      | 76 (0)      | 81 (0)      |
|                | 310 (0)     | 297 (0)     | 323 (0)     |
|                | 370 (17)    | 366 (10)    | 387 (16)    |
|                | 431 (41)    | 443 (2)     | 456 (37)    |
|                | 458 (29)    | 448 (63)    | 475 (41)    |
|                | 473 (0)     | 456 (1)     | 488 (1)     |
|                | 2064 (1302) | 1981 (1090) | 2105 (1333) |
| b <sub>2</sub> | 23 (0)      | 24 (0)      | 24 (0)      |
|                | 60 (1)      | 58 (1)      | 61 (1)      |
|                | 83 (0)      | 79 (0)      | 84 (0)      |
|                | 88 (0)      | 86 (0)      | 90 (0)      |
|                | 246 (1)     | 247 (0)     | 268 (1)     |
|                | 341 (3)     | 332 (1)     | 354 (5)     |
|                | 382 (11)    | 407 (18)    | 408 (16)    |
|                | 400 (29)    | 411 (3)     | 414 (19)    |
|                | 496 (96)    | 481 (95)    | 512 (110)   |
|                | 525 (0)     | 515 (1)     | 543 (0)     |
|                | 2076 (35)   | 1991 (6)    | 2118 (35)   |
|                | 2098 (2221) | 2012 (1944) | 2142 (2250) |

**Table S5.** The harmonic vibrational frequencies (in  $\text{cm}^{-1}$ ) and their IR intensities (in  $\text{km/mol}$ ) for  $\text{Rh}_2(\text{CO})_7$  (**7S-2**).

|                | B3LYP |        | BP86 |        | MPW1PW91 |        |
|----------------|-------|--------|------|--------|----------|--------|
| a <sub>-</sub> | 31    | (0)    | 30   | (0)    | 32       | (0)    |
|                | 61    | (0)    | 60   | (0)    | 63       | (0)    |
|                | 72    | (1)    | 68   | (1)    | 74       | (1)    |
|                | 79    | (0)    | 75   | (0)    | 81       | (0)    |
|                | 80    | (1)    | 77   | (0)    | 82       | (0)    |
|                | 89    | (0)    | 87   | (0)    | 92       | (0)    |
|                | 175   | (0)    | 171  | (0)    | 185      | (0)    |
|                | 218   | (9)    | 216  | (6)    | 227      | (8)    |
|                | 288   | (15)   | 290  | (10)   | 308      | (15)   |
|                | 340   | (18)   | 351  | (21)   | 361      | (18)   |
|                | 359   | (18)   | 364  | (6)    | 381      | (33)   |
|                | 372   | (7)    | 394  | (13)   | 392      | (13)   |
|                | 381   | (13)   | 401  | (38)   | 401      | (22)   |
|                | 424   | (27)   | 436  | (18)   | 442      | (29)   |
|                | 457   | (11)   | 451  | (16)   | 473      | (11)   |
|                | 472   | (92)   | 476  | (99)   | 491      | (100)  |
|                | 513   | (20)   | 504  | (26)   | 528      | (18)   |
|                | 520   | (30)   | 507  | (14)   | 535      | (37)   |
|                | 614   | (480)  | 594  | (412)  | 637      | (517)  |
|                | 1946  | (214)  | 1875 | (187)  | 1985     | (218)  |
|                | 2103  | (914)  | 2015 | (837)  | 2147     | (940)  |
|                | 2131  | (1761) | 2042 | (1610) | 2175     | (1790) |
|                | 2164  | (58)   | 2073 | (60)   | 2209     | (55)   |
| a <sub>-</sub> | 19    | (0)    | 13   | (0)    | 20       | (0)    |
|                | 32    | (0)    | 30   | (0)    | 33       | (0)    |
|                | 60    | (0)    | 59   | (0)    | 62       | (0)    |
|                | 73    | (0)    | 71   | (0)    | 76       | (0)    |
|                | 77    | (0)    | 77   | (0)    | 79       | (0)    |
|                | 191   | (1)    | 198  | (1)    | 206      | (1)    |
|                | 271   | (1)    | 269  | (0)    | 285      | (0)    |
|                | 281   | (0)    | 278  | (0)    | 298      | (0)    |
|                | 338   | (6)    | 337  | (0)    | 357      | (3)    |
|                | 348   | (21)   | 346  | (6)    | 363      | (12)   |
|                | 359   | (45)   | 380  | (25)   | 382      | (28)   |
|                | 393   | (28)   | 390  | (3)    | 412      | (24)   |
|                | 400   | (1)    | 411  | (10)   | 417      | (4)    |
|                | 436   | (55)   | 440  | (58)   | 455      | (64)   |
|                | 508   | (33)   | 496  | (38)   | 523      | (38)   |
|                | 550   | (4)    | 545  | (2)    | 570      | (4)    |
|                | 1922  | (1025) | 1861 | (794)  | 1959     | (1082) |
|                | 2102  | (274)  | 2013 | (227)  | 2145     | (253)  |
|                | 2109  | (1222) | 2020 | (1097) | 2152     | (1283) |

**Table S6.** The harmonic vibrational frequencies (in  $\text{cm}^{-1}$ ) and their IR intensities (in  $\text{km/mol}$ ) for  $\text{Rh}_2(\text{CO})_7$  (**7S-3**).

|                | B3LYP       | BP86        | MPW1PW91    |
|----------------|-------------|-------------|-------------|
| a <sub>-</sub> | 30 (0)      | 20 (0)      | 32 (0)      |
|                | 50 (0)      | 48 (0)      | 53 (0)      |
|                | 63 (0)      | 57 (0)      | 64 (0)      |
|                | 72 (0)      | 65 (0)      | 73 (0)      |
|                | 82 (0)      | 79 (0)      | 85 (0)      |
|                | 90 (1)      | 95 (1)      | 95 (1)      |
|                | 102 (2)     | 100 (3)     | 105 (2)     |
|                | 150 (1)     | 151 (0)     | 162 (1)     |
|                | 303 (10)    | 290 (9)     | 319 (9)     |
|                | 352 (49)    | 351 (39)    | 374 (55)    |
|                | 389 (22)    | 386 (28)    | 407 (27)    |
|                | 403 (1)     | 406 (10)    | 422 (2)     |
|                | 416 (5)     | 434 (12)    | 438 (2)     |
|                | 427 (13)    | 444 (11)    | 446 (12)    |
|                | 448 (0)     | 454 (23)    | 467 (1)     |
|                | 462 (36)    | 456 (99)    | 482 (79)    |
|                | 465 (91)    | 463 (12)    | 484 (41)    |
|                | 474 (65)    | 469 (1)     | 491 (88)    |
|                | 503 (54)    | 500 (52)    | 521 (61)    |
|                | 550 (125)   | 537 (114)   | 566 (125)   |
|                | 2048 (1058) | 1951 (778)  | 2086 (1078) |
|                | 2077 (296)  | 1992 (308)  | 2119 (317)  |
|                | 2103 (689)  | 2018 (693)  | 2146 (765)  |
|                | 2129 (959)  | 2041 (834)  | 2173 (946)  |
|                | 2180 (90)   | 2091 (94)   | 2225 (91)   |
| a <sub>-</sub> | 11i (0)     | 11i (0)     | 13i (0)     |
|                | 35 (0)      | 33 (0)      | 36 (0)      |
|                | 59 (0)      | 58 (0)      | 59 (0)      |
|                | 75 (0)      | 72 (0)      | 78 (0)      |
|                | 82 (0)      | 78 (0)      | 83 (0)      |
|                | 100 (0)     | 97 (0)      | 103 (0)     |
|                | 280 (3)     | 278 (1)     | 297 (2)     |
|                | 306 (2)     | 308 (0)     | 323 (1)     |
|                | 333 (1)     | 327 (0)     | 344 (1)     |
|                | 351 (14)    | 348 (5)     | 365 (13)    |
|                | 377 (28)    | 378 (14)    | 401 (23)    |
|                | 405 (50)    | 414 (53)    | 421 (61)    |
|                | 434 (2)     | 430 (1)     | 452 (1)     |
|                | 515 (33)    | 509 (43)    | 533 (38)    |
|                | 524 (16)    | 510 (5)     | 542 (18)    |
|                | 2065 (336)  | 1983 (233)  | 2107 (358)  |
|                | 2108 (1795) | 2019 (1638) | 2151 (1821) |

**Table S7.** The harmonic vibrational frequencies (in  $\text{cm}^{-1}$ ) and their IR intensities (in  $\text{km/mol}$ ) for  $\text{Rh}_2(\text{CO})_7$  (**7S-4**).

|                | B3LYP          | BP86        | MPW1PW91    |
|----------------|----------------|-------------|-------------|
| a <sub>1</sub> | 44 (0)         | 46 (0)      | 46 (0)      |
|                | 66 (1)         | 63 (0)      | 68 (0)      |
|                | 113 (0)        | 106 (0)     | 120 (0)     |
|                | 164 (0)        | 164 (0)     | 177 (0)     |
|                | 267 (7)        | 308 (3)     | 292 (7)     |
|                | 391 (1)        | 396 (2)     | 407 (1)     |
|                | 425 (23)       | 437 (24)    | 446 (23)    |
|                | 439 (2)        | 459 (0)     | 463 (1)     |
|                | 501 (21)       | 498 (17)    | 517 (27)    |
|                | 532 (1)        | 524 (0)     | 549 (1)     |
|                | 2026 (645)     | 1923 (547)  | 2067 (662)  |
|                | 2092 (34)      | 2007 (344)  | 2136 (332)  |
|                | 2158 (6)       | 2069 (8)    | 2203 (6)    |
| a <sub>2</sub> | 21 (0)         | 20 (0)      | 19 (0)      |
|                | 67 (0)         | 63 (0)      | 66 (0)      |
|                | 88 (0)         | 85 (0)      | 90 (0)      |
|                | 329 (0)        | 325 (0)     | 345 (0)     |
|                | 363 (0)        | 358 (0)     | 379 (0)     |
|                | 430 (0)        | 444 (0)     | 452 (0)     |
|                | 504 (0)        | 491 (0)     | 522 (0)     |
|                | 2065 (0)       | 1980 (0)    | 2106 (0)    |
|                | b <sub>1</sub> | 49 (0)      | 50 (0)      |
| 72 (1)         |                | 70 (0)      | 74 (0)      |
| 112 (0)        |                | 105 (0)     | 118 (0)     |
| 258 (7)        |                | 273 (3)     | 273 (6)     |
| 329 (7)        |                | 322 (3)     | 344 (7)     |
| 350 (0)        |                | 345 (1)     | 364 (0)     |
| 393 (60)       |                | 411 (46)    | 414 (62)    |
| 499 (41)       |                | 485 (38)    | 516 (46)    |
| 2086 (2370)    |                | 1998 (2020) | 2128 (2443) |
| b <sub>2</sub> |                | 192i (99)   | 68i (31)    |
|                | 52 (0)         | 71 (1)      | 55 (1)      |
|                | 74 (0)         | 83 (0)      | 76 (0)      |
|                | 90 (1)         | 117 (31)    | 92 (2)      |
|                | 159 (9)        | 174 (13)    | 166 (8)     |
|                | 368 (10)       | 369 (5)     | 384 (9)     |
|                | 405 (43)       | 418 (63)    | 423 (59)    |
|                | 433 (19)       | 446 (3)     | 454 (13)    |
|                | 485 (236)      | 482 (168)   | 506 (239)   |
|                | 519 (0)        | 517 (1)     | 536 (0)     |
|                | 2072 (4)       | 1988 (0)    | 2115 (1)    |
|                | 2111 (2539)    | 2027 (2130) | 2154 (2660) |



**Table S8.** The harmonic vibrational frequencies (in  $\text{cm}^{-1}$ ) and their IR intensities (in  $\text{km/mol}$ ) for  $\text{Rh}_2(\text{CO})_7$  (**7S-5**)

|                | B3LYP       | BP86        | MPW1PW91    |
|----------------|-------------|-------------|-------------|
| a <sub>1</sub> | 66 (0)      | 63 (0)      | 68 (0)      |
|                | 74 (0)      | 73 (0)      | 78 (0)      |
|                | 87 (0)      | 87 (0)      | 95 (0)      |
|                | 191 (0)     | 188 (0)     | 206 (0)     |
|                | 333 (37)    | 356 (7)     | 358 (35)    |
|                | 361 (3)     | 369 (27)    | 383 (5)     |
|                | 413 (25)    | 412 (23)    | 435 (29)    |
|                | 429 (1)     | 450 (1)     | 454 (1)     |
|                | 473 (19)    | 474 (14)    | 493 (22)    |
|                | 508 (14)    | 504 (16)    | 529 (14)    |
|                | 1935 (641)  | 1869 (548)  | 1972 (667)  |
|                | 2102 (1399) | 2013 (1240) | 2145 (1438) |
|                | 2154 (7)    | 2063 (2)    | 2199 (2)    |
| a <sub>2</sub> | 30 (0)      | 28 (0)      | 31 (0)      |
|                | 56 (0)      | 54 (0)      | 57 (0)      |
|                | 70 (0)      | 68 (0)      | 73 (0)      |
|                | 302 (0)     | 301 (0)     | 322 (0)     |
|                | 330 (0)     | 338 (0)     | 351 (0)     |
|                | 398 (0)     | 394 (0)     | 417 (0)     |
|                | 426 (0)     | 446 (0)     | 452 (0)     |
|                | 2079 (0)    | 1990 (0)    | 2125 (0)    |
|                | 28i (0)     | 37i (0)     | 27i (0)     |
| b <sub>1</sub> | 52 (0)      | 48 (0)      | 53 (0)      |
|                | 79 (1)      | 77 (0)      | 83 (0)      |
|                | 230 (3)     | 204 (4)     | 251 (3)     |
|                | 302 (1)     | 295 (0)     | 319 (1)     |
|                | 343 (13)    | 330 (12)    | 362 (14)    |
|                | 417 (65)    | 442 (51)    | 444 (66)    |
|                | 506 (31)    | 496 (31)    | 525 (38)    |
|                | 2093 (1601) | 2003 (1431) | 2138 (1627) |
|                | 27i (0)     | 37i (0)     | 27i (0)     |
| b <sub>2</sub> | 52 (0)      | 50 (0)      | 53 (0)      |
|                | 81 (0)      | 78 (0)      | 83 (0)      |
|                | 82 (1)      | 80 (0)      | 84 (1)      |
|                | 205 (0)     | 210 (0)     | 216 (0)     |
|                | 295 (28)    | 319 (11)    | 314 (31)    |
|                | 351 (4)     | 361 (8)     | 371 (1)     |
|                | 361 (8)     | 376 (26)    | 380 (20)    |
|                | 459 (48)    | 467 (178)   | 480 (51)    |
|                | 473 (200)   | 479 (53)    | 497 (216)   |
|                | 597 (50)    | 594 (53)    | 619 (57)    |
|                | 2073 (74)   | 1982 (69)   | 2114 (94)   |
|                | 2122 (1731) | 2035 (1369) | 2167 (1776) |

**Table S9.** The harmonic vibrational frequencies (in  $\text{cm}^{-1}$ ) and their IR intensities (in  $\text{km/mol}$ ) for  $\text{Rh}_2(\text{CO})_7$  (**7T-1**).

|                | B3LYP       | BP86        | MPW1PW91    |
|----------------|-------------|-------------|-------------|
| a <sub>-</sub> | 35 (0)      | 42 (0)      | 37 (0)      |
|                | 45 (0)      | 49 (0)      | 46 (0)      |
|                | 46 (1)      | 63 (0)      | 47 (0)      |
|                | 65 (0)      | 67 (0)      | 67 (0)      |
|                | 73 (0)      | 72 (0)      | 76 (0)      |
|                | 75 (0)      | 116 (1)     | 78 (0)      |
|                | 140 (0)     | 167 (0)     | 156 (0)     |
|                | 206 (9)     | 193 (1)     | 216 (7)     |
|                | 288 (6)     | 247 (0)     | 305 (4)     |
|                | 319 (59)    | 312 (31)    | 343 (50)    |
|                | 335 (32)    | 343 (11)    | 356 (39)    |
|                | 356 (76)    | 366 (21)    | 381 (96)    |
|                | 377 (18)    | 393 (14)    | 398 (17)    |
|                | 387 (1)     | 401 (16)    | 409 (2)     |
|                | 402 (6)     | 407 (14)    | 425 (5)     |
|                | 417 (31)    | 433 (32)    | 438 (37)    |
|                | 446 (2)     | 459 (26)    | 465 (2)     |
|                | 471 (47)    | 477 (26)    | 490 (71)    |
|                | 478 (30)    | 479 (38)    | 497 (17)    |
|                | 523 (58)    | 526 (73)    | 545 (72)    |
|                | 1931 (583)  | 1863 (584)  | 1969 (611)  |
|                | 2078 (9)    | 1886 (258)  | 2121 (3)    |
|                | 2088 (1221) | 2003 (1555) | 2131 (1229) |
|                | 2104 (1703) | 2014 (779)  | 2148 (1691) |
|                | 2144 (65)   | 2055 (372)  | 2190 (67)   |
| a <sub>-</sub> | 12i (0)     | 9i (0)      | 2 (0)       |
|                | 21 (0)      | 18 (0)      | 22 (0)      |
|                | 28 (0)      | 45 (0)      | 28 (0)      |
|                | 57 (0)      | 55 (0)      | 56 (0)      |
|                | 77 (0)      | 71 (0)      | 79 (0)      |
|                | 82 (0)      | 84 (0)      | 84 (0)      |
|                | 228 (6)     | 239 (1)     | 248 (5)     |
|                | 260 (4)     | 270 (0)     | 272 (3)     |
|                | 288 (2)     | 286 (0)     | 307 (2)     |
|                | 293 (0)     | 306 (1)     | 313 (0)     |
|                | 322 (2)     | 360 (16)    | 340 (3)     |
|                | 375 (32)    | 398 (2)     | 395 (30)    |
|                | 389 (11)    | 425 (0)     | 414 (12)    |
|                | 453 (5)     | 438 (64)    | 470 (4)     |
|                | 488 (40)    | 473 (1)     | 509 (48)    |
|                | 2072 (498)  | 1972 (649)  | 2113 (683)  |
|                | 2080 (1743) | 2006 (982)  | 2124 (1640) |

**Table S10.** The harmonic vibrational frequencies (in  $\text{cm}^{-1}$ ) and their IR intensities (in  $\text{km/mol}$ ) for  $\text{Rh}_2(\text{CO})_7$  (**7T-2**)

|                | B3LYP          | BP86        | MPW1PW91    |
|----------------|----------------|-------------|-------------|
| a <sub>1</sub> | 27 (0)         | 41 (0)      | 43 (0)      |
|                | 41 (0)         | 55 (0)      | 58 (0)      |
|                | 55 (0)         | 62 (0)      | 65 (0)      |
|                | 63 (0)         | 157 (0)     | 169 (0)     |
|                | 157 (0)        | 327 (2)     | 341 (7)     |
|                | 321 (8)        | 371 (36)    | 367 (35)    |
|                | 343 (35)       | 405 (9)     | 409 (0)     |
|                | 385 (1)        | 407 (2)     | 427 (29)    |
|                | 407 (21)       | 431 (34)    | 438 (24)    |
|                | 416 (25)       | 480 (1)     | 481 (4)     |
|                | 463 (3)        | 1858 (458)  | 1948 (575)  |
|                | 1914 (551)     | 2000 (1395) | 2137 (1613) |
| 2094 (1567)    | 2051 (27)      | 2191 (27)   |             |
| a <sub>2</sub> | 59 (0)         | 27 (0)      | 28 (0)      |
|                | 83 (0)         | 59 (0)      | 61 (0)      |
|                | 268 (0)        | 83 (0)      | 87 (0)      |
|                | 319 (0)        | 266 (0)     | 285 (0)     |
|                | 382 (0)        | 315 (0)     | 336 (0)     |
|                | 422 (0)        | 405 (0)     | 408 (0)     |
|                | 467 (0)        | 434 (0)     | 441 (0)     |
|                | 2089 (0)       | 1997 (0)    | 2133 (0)    |
|                | b <sub>1</sub> | 73i (4)     | 20i (0)     |
| 40 (0)         |                | 52 (0)      | 38 (0)      |
| 79 (1)         |                | 80 (0)      | 79 (1)      |
| 214 (6)        |                | 240 (1)     | 168 (10)    |
| 246 (0)        |                | 268 (0)     | 265 (0)     |
| 297 (5)        |                | 319 (2)     | 312 (5)     |
| 365 (70)       |                | 392 (47)    | 389 (71)    |
| 501 (20)       |                | 490 (32)    | 518 (21)    |
| 2074 (2120)    |                | 1985 (1749) | 2111 (2330) |
| b <sub>2</sub> | 503i (5)       | 222i (8)    | 580i (37)   |
|                | 24 (12)        | 42 (2)      | 26i (24)    |
|                | 65 (0)         | 66 (0)      | 67 (0)      |
|                | 71 (0)         | 91 (1)      | 75 (0)      |
|                | 205 (29)       | 214 (0)     | 210 (59)    |
|                | 269 (139)      | 295 (29)    | 274 (153)   |
|                | 320 (64)       | 342 (199)   | 353 (64)    |
|                | 337 (134)      | 365 (0)     | 360 (149)   |
|                | 399 (0)        | 427 (3)     | 419 (0)     |
|                | 554 (11)       | 553 (38)    | 576 (10)    |
|                | 2081 (69)      | 1987 (1)    | 2123 (494)  |
|                | 2089 (2923)    | 2008 (2038) | 2130 (2740) |

**Table S11.** The harmonic vibrational frequencies (in  $\text{cm}^{-1}$ ) and their IR intensities (in  $\text{km/mol}$ ) for  $\text{Rh}_2(\text{CO})_7$  (**7T-3**)

|                | B3LYP       | BP86        | MPW1PW91    |
|----------------|-------------|-------------|-------------|
| a <sub>1</sub> | 59 (0)      | 58 (0)      | 62 (0)      |
|                | 70 (0)      | 68 (0)      | 71 (0)      |
|                | 93 (0)      | 90 (0)      | 95 (0)      |
|                | 187 (0)     | 197 (0)     | 200 (0)     |
|                | 309 (2)     | 330 (1)     | 337 (1)     |
|                | 362 (1)     | 372 (1)     | 384 (1)     |
|                | 399 (0)     | 413 (4)     | 419 (1)     |
|                | 426 (18)    | 421 (14)    | 444 (20)    |
|                | 473 (1)     | 470 (2)     | 491 (1)     |
|                | 530 (24)    | 517 (21)    | 547 (30)    |
|                | 1893 (730)  | 1839 (640)  | 1935 (780)  |
|                | 2001 (349)  | 1917 (270)  | 2037 (340)  |
|                | 2149 (85)   | 2053 (62)   | 2195 (97)   |
| a <sub>2</sub> | 42 (0)      | 41 (0)      | 45 (0)      |
|                | 57 (0)      | 47 (0)      | 65 (0)      |
|                | 169 (0)     | 159 (0)     | 184 (0)     |
|                | 198 (0)     | 186 (0)     | 235 (0)     |
|                | 272 (0)     | 264 (0)     | 294 (0)     |
|                | 359 (0)     | 383 (0)     | 385 (0)     |
|                | 432 (0)     | 423 (0)     | 449 (0)     |
|                | 2091 (0)    | 1994 (0)    | 2136 (0)    |
| b <sub>1</sub> | 71 (0)      | 69 (0)      | 73 (0)      |
|                | 75 (2)      | 80 (2)      | 80 (2)      |
|                | 139 (0)     | 164 (0)     | 162 (0)     |
|                | 187 (1)     | 187 (0)     | 198 (0)     |
|                | 256 (2)     | 266 (1)     | 268 (1)     |
|                | 366 (27)    | 392 (20)    | 389 (29)    |
|                | 426 (43)    | 423 (46)    | 442 (47)    |
|                | 468 (13)    | 470 (3)     | 491 (14)    |
|                | 594 (182)   | 586 (210)   | 624 (228)   |
| 2111 (2503)    | 2018 (2126) | 2157 (2433) |             |
| b <sub>2</sub> | 45 (1)      | 43 (1)      | 46 (1)      |
|                | 64 (0)      | 63 (0)      | 67 (0)      |
|                | 80 (1)      | 80 (1)      | 83 (1)      |
|                | 291 (1)     | 292 (2)     | 307 (1)     |
|                | 308 (4)     | 317 (1)     | 329 (4)     |
|                | 344 (18)    | 340 (5)     | 356 (15)    |
|                | 370 (7)     | 379 (4)     | 390 (10)    |
|                | 401 (13)    | 409 (17)    | 423 (16)    |
|                | 505 (32)    | 491 (34)    | 521 (37)    |
|                | 1896 (685)  | 1841 (539)  | 1937 (706)  |
|                | 2096 (1703) | 2000 (1514) | 2141 (1742) |

**Table S12.** The harmonic vibrational frequencies (in  $\text{cm}^{-1}$ ) and their IR intensities (in  $\text{km/mol}$ ) for  $\text{Rh}_2(\text{CO})_6$  (**6S-1**).

|                | B3LYP          | BP86        | MPW1PW91    |
|----------------|----------------|-------------|-------------|
| a              | 31 (0)         | 37 (0)      | 32 (0)      |
|                | 72 (0)         | 70 (0)      | 74 (0)      |
|                | 188 (0)        | 191 (0)     | 197 (0)     |
|                | 327 (0)        | 324 (0)     | 339 (0)     |
|                | 372 (0)        | 391 (0)     | 389 (0)     |
|                | 436 (0)        | 450 (0)     | 455 (0)     |
|                | 488 (0)        | 478 (0)     | 508 (0)     |
|                | 1945 (0)       | 1875 (0)    | 987 (0)     |
|                | 2157 (0)       | 2062 (0)    | 2202 (0)    |
| b <sub>1</sub> | 59 (0)         | 58 (0)      | 60 (0)      |
|                | 76 (0)         | 76 (0)      | 79 (0)      |
|                | 357 (6)        | 357 (0)     | 375 (6)     |
|                | 398 (2)        | 406 (0)     | 413 (2)     |
|                | 405 (27)       | 426 (2)     | 423 (24)    |
|                | 455 (90)       | 458 (75)    | 473 (105)   |
|                | 1923 (1317)    | 1066 (1037) | 1963 (1340) |
|                | 2099 (868)     | 2003 (521)  | 2143 (907)  |
|                | b <sub>2</sub> | 14i (0)     | 7i (0)      |
| 43 (1)         |                | 34 (0)      | 45 (1)      |
| 94 (0)         |                | 94 (0)      | 96 (0)      |
| 228 (0)        |                | 239 (0)     | 240 (0)     |
| 290 (0)        |                | 284 (1)     | 305 (0)     |
| 345 (6)        |                | 343 (7)     | 358 (5)     |
| 379 (18)       |                | 376 (7)     | 397 (16)    |
| 461 (1)        |                | 452 (5)     | 476 (1)     |
| 545 (31)       |                | 525 (39)    | 564 (33)    |
| 2102 (961)     |                | 2009 (1085) | 2145 (894)  |
| b <sub>3</sub> | 23 (0)         | 30 (0)      | 26 (0)      |
|                | 79 (0)         | 77 (0)      | 81 (0)      |
|                | 207 (2)        | 196 (1)     | 212 (2)     |
|                | 311 (1)        | 302 (0)     | 324 (1)     |
|                | 391 (16)       | 401 (2)     | 410 (16)    |
|                | 461 (122)      | 460 (119)   | 479 (123)   |
|                | 503 (43)       | 505 (29)    | 516 (52)    |
|                | 602 (237)      | 570 (89)    | 624 (264)   |
|                | 2121 (2346)    | 2027 (2048) | 2164 (2346) |

**Table S13.** The harmonic vibrational frequencies (in  $\text{cm}^{-1}$ ) and their IR intensities (in  $\text{km/mol}$ ) for  $\text{Rh}_2(\text{CO})_6$  (**6S-2**)

|                | B3LYP       | BP86        | MPW1PW91    |
|----------------|-------------|-------------|-------------|
| a <sub>1</sub> | 77 (0)      | 74 (0)      | 79 (0)      |
|                | 165 (0)     | 167 (0)     | 177 (0)     |
|                | 430 (0)     | 445 (0)     | 449 (0)     |
|                | 446 (0)     | 459 (0)     | 465 (0)     |
|                | 548 (0)     | 531 (0)     | 562 (0)     |
|                | 2096 (0)    | 2012 (0)    | 2139 (0)    |
|                | 2169 (0)    | 2081 (0)    | 2213 (0)    |
| a <sub>2</sub> | 323 (0)     | 313 (0)     | 332 (0)     |
| b <sub>1</sub> | 35 (0)      | 38 (0)      | 37 (0)      |
|                | 334 (0)     | 326 (0)     | 345 (0)     |
| b <sub>2</sub> | 82 (4)      | 77 (4)      | 82 (5)      |
|                | 419 (1)     | 436 (11)    | 438 (0)     |
|                | 440 (20)    | 450 (15)    | 457 (27)    |
|                | 495 (431)   | 485 (357)   | 507 (448)   |
|                | 2087 (1379) | 2003 (1350) | 2130 (1481) |
|                | 2131 (665)  | 2048 (458)  | 2173 (652)  |
|                | 27 (0)      | 12i (0)     | 26 (0)      |
|                | 53 (1)      | 44 (0)      | 52 (1)      |
|                | 62 (0)      | 56 (0)      | 61 (0)      |
|                | 82 (0)      | 80 (0)      | 83 (0)      |
|                | 344 (1)     | 332 (0)     | 356 (1)     |
|                | 373 (18)    | 374 (9)     | 388 (18)    |
|                | 418 (34)    | 423 (21)    | 434 (32)    |
|                | 461 (4)     | 443 (3)     | 474 (4)     |
|                | 506 (44)    | 500 (48)    | 524 (54)    |
|                | 2080 (1475) | 1994 (1279) | 2121 (1507) |

**Table S14.** The harmonic vibrational frequencies (in  $\text{cm}^{-1}$ ) and their IR intensities (in  $\text{km/mol}$ ) for  $\text{Rh}_2(\text{CO})_6$  (**6S-3**).

|          | B3LYP       | BP86        | MPW1PW91    |
|----------|-------------|-------------|-------------|
| $a_g$    | 77 (0)      | 75 (0)      | 80 (0)      |
|          | 200 (0)     | 204 (0)     | 213 (0)     |
|          | 342 (0)     | 365 (0)     | 362 (0)     |
|          | 458 (0)     | 479 (0)     | 480 (0)     |
|          | 530 (0)     | 522 (0)     | 550 (0)     |
|          | 2020 (0)    | 1924 (0)    | 2062 (0)    |
|          | 2141 (0)    | 2051 (0)    | 2186 (0)    |
| $a_u$    | 34i (0)     | 49i (0)     | 35i (0)     |
|          | 270 (0)     | 235 (0)     | 286 (0)     |
| $b_{1g}$ | 84 (0)      | 78 (0)      | 87 (0)      |
|          | 383 (0)     | 383 (0)     | 402 (0)     |
|          | 454 (0)     | 471 (0)     | 477 (0)     |
|          | 2074 (0)    | 1986 (0)    | 2118 (0)    |
| $b_{2g}$ | 71 (0)      | 69 (0)      | 73 (0)      |
|          | 176 (0)     | 193 (0)     | 187 (0)     |
|          | 319 (0)     | 331 (0)     | 335 (0)     |
|          | 485 (0)     | 470 (0)     | 503 (0)     |
| $b_{3g}$ | 56 (0)      | 56 (0)      | 58 (0)      |
|          | 297 (0)     | 289 (0)     | 312 (0)     |
|          | 509 (0)     | 517 (0)     | 528 (0)     |
| $b_{1u}$ | 63 (0)      | 61 (0)      | 65 (0)      |
|          | 327 (22)    | 355 (11)    | 348 (22)    |
|          | 463 (34)    | 468 (29)    | 482 (39)    |
|          | 2011 (1435) | 1918 (1173) | 2052 (1490) |
| $b_{2u}$ | 19 (0)      | 22 (0)      | 21 (0)      |
|          | 64 (0)      | 65 (0)      | 66 (0)      |
|          | 298 (2)     | 297 (1)     | 315 (1)     |
|          | 428 (85)    | 426 (52)    | 448 (78)    |
|          | 452 (24)    | 471 (34)    | 473 (39)    |
|          | 2084 (1790) | 1996 (1576) | 2128 (1823) |
| $b_{3u}$ | 76 (1)      | 76 (0)      | 72 (5)      |
|          | 121 (12)    | 139 (2)     | 109 (19)    |
|          | 161 (18)    | 281 (26)    | 164 (15)    |
|          | 412 (12)    | 418 (24)    | 429 (16)    |
|          | 511 (126)   | 510 (76)    | 532 (132)   |
|          | 2108 (2130) | 2018 (1858) | 2153 (2213) |

**Table S15.** The harmonic vibrational frequencies (in  $\text{cm}^{-1}$ ) and their IR intensities (in  $\text{km/mol}$ ) for  $\text{Rh}_2(\text{CO})_6$  (**6S-4**).

|          | B3LYP |        | BP86 |        | MPW1PW91 |        |
|----------|-------|--------|------|--------|----------|--------|
| $a_g$    | 131   | (0)    | 132  | (0)    | 141      | (0)    |
|          | 147   | (0)    | 144  | (0)    | 153      | (0)    |
|          | 429   | (0)    | 438  | (0)    | 445      | (0)    |
|          | 456   | (0)    | 473  | (0)    | 478      | (0)    |
|          | 562   | (0)    | 548  | (0)    | 579      | (0)    |
|          | 2096  | (0)    | 2014 | (0)    | 2139     | (0)    |
|          | 2171  | (0)    | 2085 | (0)    | 2215     | (0)    |
| $a_u$    | 38i   | (0)    | 38i  | (0)    | 40i      | (0)    |
|          | 327   | (0)    | 319  | (0)    | 336      | (0)    |
| $b_{1g}$ | 324   | (0)    | 316  | (0)    | 334      | (0)    |
| $b_{2g}$ | 24    | (0)    | 24i  | (0)    | 23       | (0)    |
|          | 68    | (0)    | 56   | (0)    | 67       | (0)    |
|          | 397   | (0)    | 391  | (0)    | 413      | (0)    |
|          | 459   | (0)    | 431  | (0)    | 472      | (0)    |
| $b_{3g}$ | 32    | (0)    | 14   | (0)    | 19       | (0)    |
|          | 90    | (0)    | 87   | (0)    | 91       | (0)    |
|          | 349   | (0)    | 346  | (0)    | 363      | (0)    |
|          | 435   | (0)    | 447  | (0)    | 455      | (0)    |
|          | 526   | (0)    | 515  | (0)    | 542      | (0)    |
|          | 2057  | (0)    | 1972 | (0)    | 2097     | (0)    |
| $b_{1u}$ | 100   | (4)    | 95   | (4)    | 100      | (5)    |
|          | 411   | (21)   | 419  | (31)   | 425      | (28)   |
|          | 457   | (28)   | 474  | (11)   | 478      | (28)   |
|          | 560   | (385)  | 554  | (303)  | 578      | (397)  |
|          | 2080  | (513)  | 1999 | (583)  | 2122     | (522)  |
|          | 2123  | (1702) | 2043 | (1299) | 2165     | (1779) |
| $b_{2u}$ | 72    | (0)    | 70   | (0)    | 74       | (0)    |
|          | 144   | (0)    | 141  | (0)    | 150      | (0)    |
|          | 356   | (7)    | 351  | (1)    | 370      | (8)    |
|          | 428   | (133)  | 438  | (115)  | 447      | (140)  |
|          | 527   | (14)   | 515  | (9)    | 545      | (15)   |
|          | 2092  | (2719) | 2007 | (2339) | 2133     | (2809) |
| $b_{3u}$ | 22    | (0)    | 4i   | (0)    | 23       | (0)    |
|          | 59    | (1)    | 48   | (1)    | 59       | (2)    |
|          | 345   | (3)    | 336  | (2)    | 361      | (3)    |
|          | 457   | (1)    | 435  | (0)    | 470      | (1)    |



**Table S16.** The harmonic vibrational frequencies (in  $\text{cm}^{-1}$ ) and their IR intensities (in  $\text{km/mol}$ ) for  $\text{Rh}_2(\text{CO})_6$  (**6T-1**).

|             | B3LYP       | BP86        | MPW1PW91    |
|-------------|-------------|-------------|-------------|
| $a_g$       | 43 (0)      | 47 (0)      | 45 (0)      |
|             | 69 (0)      | 68 (0)      | 73 (0)      |
|             | 180 (0)     | 189 (0)     | 191 (0)     |
|             | 278 (0)     | 281 (0)     | 297 (0)     |
|             | 334 (0)     | 368 (0)     | 351 (0)     |
|             | 393 (0)     | 410 (0)     | 415 (0)     |
|             | 446 (0)     | 444 (0)     | 473 (0)     |
|             | 493 (0)     | 503 (0)     | 511 (0)     |
|             | 1956 (0)    | 1870 (0)    | 1993 (0)    |
|             | 2130 (0)    | 2037 (0)    | 2175 (0)    |
| $a_u$       | 29 (0)      | 33 (0)      | 25 (1)      |
|             | 73 (0)      | 71 (0)      | 77 (0)      |
|             | 179 (3)     | 185 (1)     | 186 (4)     |
|             | 260 (5)     | 278 (4)     | 260 (8)     |
|             | 361 (17)    | 417 (24)    | 375 (14)    |
|             | 398 (52)    | 441 (44)    | 422 (47)    |
|             | 466 (76)    | 474 (69)    | 492 (93)    |
|             | 2095 (2804) | 2007 (2315) | 2140 (2905) |
| $b_g$       | 28i (0)     | 32i (0)     | 31i (0)     |
|             | 78 (0)      | 76 (0)      | 81 (0)      |
|             | 187 (0)     | 221 (0)     | 200 (0)     |
|             | 239 (0)     | 266 (0)     | 255 (0)     |
|             | 302 (0)     | 298 (0)     | 324 (0)     |
|             | 357 (0)     | 361 (0)     | 377 (0)     |
|             | 414 (0)     | 438 (0)     | 445 (0)     |
|             | 2076 (0)    | 1984 (0)    | 2120 (0)    |
|             | $b_u$       | 12 (0)      | 16 (0)      |
| 31 (1)      |             | 30 (0)      | 30 (0)      |
| 63 (1)      |             | 66 (0)      | 64 (0)      |
| 280 (0)     |             | 277 (0)     | 298 (0)     |
| 324 (4)     |             | 318 (3)     | 345 (3)     |
| 354 (11)    |             | 375 (4)     | 374 (12)    |
| 392 (34)    |             | 414 (10)    | 415 (23)    |
| 426 (63)    |             | 444 (64)    | 447 (81)    |
| 1955 (1208) |             | 1861 (933)  | 1993 (1253) |
| 2082 (1831) |             | 1990 (1630) | 2125 (1841) |

**Table S17.** The harmonic vibrational frequencies (in  $\text{cm}^{-1}$ ) and their IR intensities (in  $\text{km/mol}$ ) for  $\text{Rh}_2(\text{CO})_6$  (**6T-2**).

|                 | B3LYP       | BP86        | MPW1PW91    |
|-----------------|-------------|-------------|-------------|
| a <sub>g</sub>  | 56 (0)      | 57 (0)      | 58 (0)      |
|                 | 198 (0)     | 202 (0)     | 211 (0)     |
|                 | 371 (0)     | 400 (0)     | 390 (0)     |
|                 | 396 (0)     | 412 (0)     | 417 (0)     |
|                 | 442 (0)     | 466 (0)     | 459 (0)     |
|                 | 1967 (0)    | 1883 (0)    | 2008 (0)    |
|                 | 2136 (0)    | 2036 (0)    | 2179 (0)    |
| a <sub>u</sub>  | 36 (0)      | 37 (0)      | 37 (0)      |
|                 | 315 (0)     | 320 (0)     | 330 (0)     |
| b <sub>1g</sub> | 56 (0)      | 53 (0)      | 57 (0)      |
|                 | 296 (0)     | 287 (0)     | 311 (0)     |
|                 | 352 (0)     | 389 (0)     | 372 (0)     |
|                 | 2077 (0)    | 1979 (0)    | 2119 (0)    |
| b <sub>2g</sub> | 24i (0)     | 8i (0)      | 47i (0)     |
|                 | 202 (0)     | 207 (0)     | 200 (0)     |
|                 | 239 (0)     | 262 (0)     | 244 (0)     |
|                 | 283 (0)     | 295 (0)     | 301 (0)     |
| b <sub>3g</sub> | 95i (0)     | 107i (0)    | 100i (0)    |
|                 | 130 (0)     | 120 (0)     | 138 (0)     |
|                 | 302 (0)     | 318 (0)     | 312 (0)     |
| b <sub>1u</sub> | 73i (1)     | 73i (0)     | 84i (1)     |
|                 | 194 (0)     | 186 (0)     | 198 (0)     |
|                 | 373 (15)    | 392 (10)    | 396 (15)    |
|                 | 1949 (1207) | 1866 (940)  | 1989 (1259) |
| b <sub>2u</sub> | 18 (0)      | 17 (0)      | 17 (0)      |
|                 | 72 (1)      | 70 (1)      | 73 (1)      |
|                 | 259 (6)     | 254 (2)     | 272 (6)     |
|                 | 364 (44)    | 392 (14)    | 382 (40)    |
|                 | 429 (43)    | 430 (53)    | 445 (52)    |
|                 | 2086 (2090) | 1989 (1838) | 2128 (2137) |
| b <sub>3u</sub> | 48 (0)      | 54 (0)      | 47 (0)      |
|                 | 162 (1)     | 174 (0)     | 161 (1)     |
|                 | 324 (7)     | 378 (23)    | 330 (8)     |
|                 | 354 (145)   | 390 (108)   | 370 (148)   |
|                 | 428 (26)    | 472 (8)     | 440 (36)    |
|                 | 2092 (2585) | 1996 (2201) | 2133 (2696) |

**Table S18.** The harmonic vibrational frequencies (in  $\text{cm}^{-1}$ ) and their IR intensities (in  $\text{km/mol}$ ) for  $\text{Rh}_2(\text{CO})_6$  (**6T-3**).

|     | B3LYP       | BP86        | MPW1PW91    |
|-----|-------------|-------------|-------------|
| a'  | 40 (0)      | 25 (0)      | 37 (0)      |
|     | 54 (0)      | 52 (0)      | 58 (0)      |
|     | 62 (1)      | 62 (0)      | 67 (0)      |
|     | 74 (0)      | 73 (0)      | 76 (0)      |
|     | 85 (0)      | 82 (1)      | 88 (0)      |
|     | 88 (0)      | 86 (0)      | 92 (0)      |
|     | 139 (0)     | 148 (0)     | 155 (0)     |
|     | 320 (3)     | 309 (5)     | 335 (4)     |
|     | 342 (0)     | 347 (2)     | 364 (0)     |
|     | 392 (26)    | 409 (32)    | 411 (32)    |
|     | 399 (43)    | 417 (13)    | 415 (40)    |
|     | 414 (21)    | 438 (3)     | 437 (22)    |
|     | 428 (0)     | 451 (42)    | 446 (2)     |
|     | 442 (6)     | 459 (12)    | 459 (12)    |
|     | 448 (0)     | 466 (8)     | 468 (1)     |
|     | 492 (2)     | 490 (17)    | 509 (10)    |
|     | 501 (58)    | 496 (33)    | 521 (57)    |
|     | 511 (196)   | 499 (96)    | 529 (208)   |
|     | 2057 (146)  | 1968 (348)  | 2099 (165)  |
|     | 2076 (1254) | 1987 (932)  | 2117 (1259) |
|     | 2084 (790)  | 2001 (546)  | 2127 (812)  |
|     | 2094 (1438) | 2011 (1186) | 2137 (1435) |
|     | 2150 (85)   | 2062 (109)  | 2196 (103)  |
| a'' | 4 (0)       | 7i (0)      | 4i (1)      |
|     | 28 (0)      | 16 (0)      | 30 (0)      |
|     | 46 (0)      | 42 (0)      | 47 (0)      |
|     | 65 (0)      | 62 (0)      | 66 (0)      |
|     | 76 (0)      | 76 (0)      | 78 (0)      |
|     | 283 (1)     | 285 (0)     | 298 (0)     |
|     | 312 (0)     | 304 (0)     | 323 (0)     |
|     | 326 (1)     | 326 (1)     | 344 (1)     |
|     | 358 (3)     | 364 (1)     | 382 (5)     |
|     | 378 (37)    | 397 (17)    | 399 (36)    |
|     | 424 (14)    | 416 (1)     | 445 (13)    |
|     | 432 (1)     | 427 (21)    | 450 (4)     |
|     | 2062 (1588) | 1972 (1329) | 2103 (1645) |

**Table S19.** The harmonic vibrational frequencies (in  $\text{cm}^{-1}$ ) and their IR intensities (in  $\text{km/mol}$ ) for  $\text{Rh}_2(\text{CO})_6$  (**6T-5**)\*

|                             | B3LYP       | BP86        | MPW1PW91    |
|-----------------------------|-------------|-------------|-------------|
| a <sub>1</sub> <sup>+</sup> | 53 (0)      | 53 (0)      | 54 (0)      |
|                             | 175 (0)     | 172 (0)     | 189 (0)     |
|                             | 394 (0)     | 421 (0)     | 413 (0)     |
|                             | 455 (0)     | 481 (0)     | 469 (0)     |
|                             | 2135 (0)    | 2037 (0)    | 2179 (0)    |
| a <sub>1</sub> <sup>g</sup> | 9 (0)       | 7 (0)       | 9 (0)       |
|                             | 263 (0)     | 260 (0)     | 276 (0)     |
| a <sub>2</sub> <sup>+</sup> | 259 (0)     | 257 (0)     | 273 (0)     |
| a <sub>2</sub> <sup>g</sup> | 94i (44)    | 52i (0)     | 127i (79)   |
|                             | 166 (120)   | 215 (48)    | 157 (111)   |
|                             | 390 (35)    | 424 (19)    | 406 (41)    |
|                             | 2068 (2814) | 1988 (2036) | 2108 (2993) |
| e <sup>+</sup>              | 11i (1)     | 8i (0)      | 22i (1)     |
|                             | 61 (0)      | 63 (0)      | 63 (0)      |
|                             | 241 (5)     | 245 (2)     | 249 (6)     |
|                             | 367 (113)   | 400 (95)    | 390 (120)   |
|                             | 444 (12)    | 456 (4)     | 460 (14)    |
|                             | 2071 (2094) | 1977 (1800) | 2114 (2161) |
| e <sup>g</sup>              | 267i (0)    | 69i (0)     | 332i (0)    |
|                             | 29 (0)      | 29 (0)      | 15 (0)      |
|                             | 90 (0)      | 167 (0)     | 90 (0)      |
|                             | 277 (0)     | 294 (0)     | 284 (0)     |
|                             | 375 (0)     | 411 (0)     | 396 (0)     |
|                             | 2058 (0)    | 1960 (0)    | 2099 (0)    |

\*Only one line for each frequency for the degenerate modes

**Table S20.** The harmonic vibrational frequencies (in  $\text{cm}^{-1}$ ) and their IR intensities (in  $\text{km/mol}$ ) for  $\text{Rh}_2(\text{CO})_6$  (**6T-4**).

|                 | B3LYP |        | BP86 |        | MPW1PW91 |        |
|-----------------|-------|--------|------|--------|----------|--------|
| a <sub>1g</sub> | 51    | (0)    | 51   | (0)    | 54       | (0)    |
|                 | 174   | (0)    | 171  | (0)    | 189      | (0)    |
|                 | 394   | (0)    | 422  | (0)    | 413      | (0)    |
|                 | 451   | (0)    | 478  | (0)    | 469      | (0)    |
|                 | 2135  | (0)    | 2036 | (0)    | 2179     | (0)    |
| a <sub>2g</sub> | 260   | (0)    | 257  | (0)    | 9        | (0)    |
| a <sub>1u</sub> | 11i   | (15)   | 9i   | (0)    | 276      | (0)    |
|                 | 256   | (0)    | 254  | (0)    | 273      | (0)    |
| a <sub>2u</sub> | 109i  | (65)   | 60i  | (4)    | 127i     | (79)   |
|                 | 155   | (117)  | 208  | (52)   | 157      | (111)  |
|                 | 390   | (35)   | 423  | (19)   | 406      | (41)   |
|                 | 2068  | (2829) | 1988 | (2027) | 2108     | (2993) |
| e <sub>g</sub>  | 13i   | (0)    | 34i  | (0)    | 22i      | (1)    |
|                 | 65    | (0)    | 63   | (0)    | 63       | (0)    |
|                 | 239   | (0)    | 232  | (0)    | 249      | (6)    |
|                 | 376   | (0)    | 408  | (0)    | 390      | (120)  |
|                 | 443   | (0)    | 454  | (0)    | 460      | (13)   |
|                 | 2063  | (0)    | 1966 | (0)    | 2114     | (2161) |
| e <sub>u</sub>  | 318i  | (17)   | 74i  | (3)    | 332i     | (0)    |
|                 | 18i   | (0)    | 8    | (0)    | 16       | (0)    |
|                 | 84    | (3)    | 166  | (13)   | 90       | (0)    |
|                 | 274   | (1)    | 291  | (8)    | 284      | (0)    |
|                 | 368   | (98)   | 405  | (71)   | 396      | (0)    |
|                 | 2067  | (2152) | 1972 | (1850) | 2099     | (0)    |

**Table S21.** The harmonic vibrational frequencies (in  $\text{cm}^{-1}$ ) and their IR intensities (in  $\text{km/mol}$ ) for  $\text{Rh}_2(\text{CO})_5$  (**5S-1**).

|                | B3LYP       | BP86        | MPW1PW91    |
|----------------|-------------|-------------|-------------|
| a <sub>1</sub> | 45 (1)      | 44 (1)      | 46 (1)      |
|                | 72 (0)      | 70 (0)      | 75 (0)      |
|                | 195 (0)     | 196 (0)     | 205 (0)     |
|                | 367 (0)     | 368 (0)     | 382 (0)     |
|                | 412 (7)     | 427 (4)     | 432 (7)     |
|                | 452 (9)     | 474 (4)     | 471 (8)     |
|                | 519 (10)    | 511 (9)     | 538 (11)    |
|                | 1980 (760)  | 1897 (591)  | 2020 (780)  |
|                | 2140 (17)   | 2048 (10)   | 2185 (12)   |
| a <sub>2</sub> | 25 (0)      | 29 (0)      | 28 (0)      |
|                | 72 (0)      | 67 (0)      | 74 (0)      |
|                | 321 (0)     | 321 (0)     | 336 (0)     |
|                | 399 (0)     | 394 (0)     | 413 (0)     |
|                | 452 (0)     | 471 (0)     | 472 (0)     |
|                | 2072 (0)    | 1982 (0)    | 2115 (0)    |
| b <sub>1</sub> | 7 (0)       | 10 (0)      | 7 (0)       |
|                | 70 (0)      | 70 (0)      | 72 (0)      |
|                | 289 (1)     | 282 (0)     | 304 (1)     |
|                | 328 (2)     | 322 (2)     | 341 (2)     |
|                | 438 (88)    | 460 (74)    | 460 (91)    |
|                | 492 (20)    | 486 (7)     | 510 (25)    |
| 2080 (2023)    | 1990 (1777) | 2123 (2076) |             |
| b <sub>2</sub> | 49 (0)      | 48 (0)      | 53 (0)      |
|                | 69 (0)      | 70 (0)      | 70 (0)      |
|                | 179 (0)     | 193 (0)     | 188 (0)     |
|                | 308 (3)     | 323 (4)     | 320 (5)     |
|                | 385 (7)     | 389 (2)     | 402 (8)     |
|                | 451 (52)    | 454 (101)   | 471 (55)    |
|                | 493 (111)   | 501 (30)    | 513 (127)   |
|                | 2107 (2010) | 2018 (1671) | 2151 (2097) |

**Table S22.** The harmonic vibrational frequencies (in  $\text{cm}^{-1}$ ) and their IR intensities (in  $\text{km/mol}$ ) for  $\text{Rh}_2(\text{CO})_5$  (**5T-1**).

|   | B3LYP       | BP86        | MPW1PW91    |
|---|-------------|-------------|-------------|
| a | 35 (0)      | 39 (1)      | 38 (0)      |
|   | 43 (0)      | 60 (0)      | 44 (0)      |
|   | 59 (0)      | 62 (0)      | 60 (0)      |
|   | 77 (0)      | 81 (0)      | 79 (0)      |
|   | 158 (0)     | 196 (2)     | 172 (0)     |
|   | 294 (1)     | 232 (2)     | 303 (1)     |
|   | 309 (0)     | 341 (2)     | 324 (0)     |
|   | 350 (2)     | 386 (3)     | 367 (3)     |
|   | 376 (13)    | 402 (1)     | 398 (12)    |
|   | 414 (4)     | 429 (2)     | 438 (4)     |
|   | 423 (10)    | 453 (9)     | 444 (13)    |
|   | 439 (2)     | 475 (1)     | 458 (1)     |
|   | 1949 (627)  | 1888 (632)  | 1990 (651)  |
|   | 2063 (491)  | 1934 (211)  | 2104 (501)  |
|   | 2118 (8)    | 2019 (45)   | 2162 (12)   |
| b | 14i (0)     | 20i (3)     | 22i (0)     |
|   | 56 (0)      | 65 (1)      | 57 (0)      |
|   | 67 (0)      | 72 (0)      | 70 (22)     |
|   | 70 (1)      | 81 (5)      | 73 (1)      |
|   | 192 (0)     | 164 (2)     | 199 (1)     |
|   | 274 (4)     | 207 (9)     | 279 (8)     |
|   | 275 (2)     | 267 (3)     | 285 (3)     |
|   | 332 (54)    | 339 (11)    | 349 (52)    |
|   | 365 (14)    | 395 (36)    | 383 (13)    |
|   | 394 (132)   | 414 (6)     | 416 (150)   |
|   | 403 (28)    | 433 (10)    | 420 (23)    |
|   | 439 (8)     | 441 (53)    | 459 (7)     |
|   | 484 (49)    | 500 (40)    | 504 (58)    |
|   | 2054 (1133) | 1918 (909)  | 2094 (1146) |
|   | 2080 (2815) | 1987 (2570) | 2122 (2905) |

**Table S23.** The harmonic vibrational frequencies (in  $\text{cm}^{-1}$ ) and their IR intensities (in  $\text{km/mol}$ ) for  $\text{Rh}_2(\text{CO})_5$  (**5T-2**).

|                | B3LYP       | BP86        | MPW1PW91    |
|----------------|-------------|-------------|-------------|
| a <sub>1</sub> | 18 (1)      | 16 (1)      | 24 (1)      |
|                | 68 (1)      | 67 (17)     | 69 (1)      |
|                | 243 (0)     | 253 (0)     | 255 (0)     |
|                | 308 (1)     | 312 (0)     | 325 (1)     |
|                | 331 (9)     | 358 (8)     | 355 (9)     |
|                | 372 (0)     | 393 (0)     | 392 (0)     |
|                | 426 (0)     | 452 (0)     | 444 (1)     |
|                | 450 (0)     | 453 (0)     | 466 (0)     |
|                | 1978 (999)  | 1888 (806)  | 2016 (1023) |
|                | 2004 (6)    | 1914 (1)    | 2044 (20)   |
|                | 2123 (2)    | 2025 (2)    | 2167 (7)    |
| a <sub>2</sub> | 167i (0)    | 79i (0)     | 208i (0)    |
|                | 91 (0)      | 158 (0)     | 90 (0)      |
|                | 177 (0)     | 199 (0)     | 183 (0)     |
|                | 311 (0)     | 320 (0)     | 316 (0)     |
| b <sub>1</sub> | 32i (1)     | 27i (1)     | 45i (1)     |
|                | 68 (1)      | 67 (1)      | 69 (1)      |
|                | 261 (0)     | 270 (0)     | 271 (0)     |
|                | 284 (0)     | 293 (0)     | 283 (0)     |
|                | 330 (10)    | 356 (7)     | 352 (9)     |
|                | 452 (0)     | 455 (0)     | 470 (0)     |
|                | 1980 (1020) | 1889 (817)  | 2021 (1071) |
| b <sub>2</sub> | 129i (0)    | 48i (0)     | 147i (0)    |
|                | 104 (0)     | 162 (0)     | 109 (0)     |
|                | 148 (2)     | 167 (0)     | 154 (2)     |
|                | 177 (0)     | 217 (0)     | 179 (0)     |
|                | 323 (5)     | 330 (1)     | 235 (15)    |
|                | 355 (154)   | 388 (89)    | 366 (160)   |
|                | 481 (54)    | 504 (32)    | 500 (54)    |
|                | 2078 (3684) | 1986 (2960) | 2119 (3850) |



**Table S24.** Coordinates of the optimized  $\text{Rh}_2(\text{CO})_n$  ( $n = 8, 7, 6, 5$ ) structures using the B3LYP method.

**8S-1**

| 0  | 1 |           |           |           |
|----|---|-----------|-----------|-----------|
| C  | 0 | 1.436415  | 2.172905  | -1.531149 |
| C  | 0 | -1.436415 | 2.172905  | -1.531149 |
| O  | 0 | 0.000000  | 3.203053  | 2.175431  |
| O  | 0 | 2.258424  | 2.652548  | -2.175431 |
| O  | 0 | -2.258424 | 2.652548  | -2.175431 |
| C  | 0 | -1.436415 | -2.172905 | -1.531149 |
| C  | 0 | 1.436415  | -2.172905 | -1.531149 |
| O  | 0 | -2.258424 | -2.652548 | -2.175431 |
| O  | 0 | 2.258424  | -2.652548 | -2.175431 |
| O  | 0 | 0.000000  | -3.203053 | 2.175431  |
| O  | 0 | 2.462790  | 0.000000  | 0.785620  |
| Rh | 0 | 0.000000  | 1.407211  | -0.395284 |
| Rh | 0 | 0.000000  | -1.407211 | -0.395284 |
| C  | 0 | 1.391261  | 0.000000  | 0.300545  |
| C  | 0 | 0.000000  | 2.491640  | 1.272790  |
| C  | 0 | 0.000000  | -2.491640 | 1.272790  |
| O  | 0 | -2.462790 | 0.000000  | 0.785620  |
| C  | 0 | -1.391261 | 0.000000  | 0.300545  |

**8S-2**

| 0  | 1 |           |           |           |
|----|---|-----------|-----------|-----------|
| Rh | 0 | -1.431870 | 0.029663  | 0.182144  |
| C  | 0 | -0.933075 | 1.811035  | 0.759277  |
| C  | 0 | -1.166397 | -1.767487 | -0.492188 |
| C  | 0 | -2.234436 | -0.516266 | 1.892838  |
| C  | 0 | -2.614075 | 0.616684  | -1.276031 |
| O  | 0 | -0.724426 | 2.887024  | 1.118973  |
| O  | 0 | -1.098450 | -2.849274 | -0.887070 |
| O  | 0 | -2.773163 | -0.820953 | 2.864578  |
| O  | 0 | -3.365982 | 0.948135  | -2.083603 |
| Rh | 0 | 1.431870  | -0.029663 | -0.182144 |
| C  | 0 | 1.262650  | -0.657074 | 1.643448  |
| C  | 0 | 0.836853  | 0.613571  | -1.910522 |
| C  | 0 | 2.528305  | 1.545135  | 0.249527  |
| C  | 0 | 2.320206  | -1.645630 | -0.866333 |
| O  | 0 | 1.252701  | -1.037277 | 2.732529  |
| O  | 0 | 0.570175  | 0.999512  | -2.964417 |
| O  | 0 | 3.232025  | 2.427582  | 0.480713  |
| O  | 0 | 2.907089  | -2.554794 | -1.261703 |

**8S-3**

|      | 0         | 1         |           |
|------|-----------|-----------|-----------|
| Rh 0 | -1.383148 | 0.011185  | 0.390823  |
| C 0  | -0.736481 | 0.900452  | 2.026321  |
| O 0  | -0.408005 | 1.422546  | 3.000015  |
| C 0  | -1.658524 | 1.079773  | -1.242004 |
| O 0  | -1.870865 | 1.706985  | -2.185425 |
| C 0  | -1.261749 | -1.950745 | 0.248917  |
| O 0  | -1.241302 | -3.101089 | 0.180054  |
| C 0  | -3.233551 | 0.026108  | 0.913651  |
| O 0  | -4.340607 | 0.035034  | 1.226471  |
| Rh 0 | 1.383148  | -0.011185 | -0.390823 |
| C 0  | 1.261749  | 1.950745  | -0.248917 |
| O 0  | 1.241302  | 3.101089  | -0.180054 |
| C 0  | 3.233551  | -0.026108 | -0.913651 |
| O 0  | 4.340607  | -0.035034 | -1.226471 |
| C 0  | 0.736481  | -0.900452 | -2.026321 |
| O 0  | 0.408005  | -1.422546 | -3.000015 |
| C 0  | 1.658524  | -1.079773 | 1.242004  |
| O 0  | 1.870865  | -1.706985 | 2.185425  |

**7S-1**

|      | 0         | 1         |           |
|------|-----------|-----------|-----------|
| Rh 0 | 0.000000  | 0.000000  | -2.061245 |
| C 0  | 0.000000  | 1.668170  | -3.113875 |
| C 0  | 0.000000  | -1.668170 | -3.113875 |
| C 0  | 1.871090  | 0.000000  | -1.581075 |
| C 0  | -1.871090 | 0.000000  | -1.581075 |
| O 0  | 0.000000  | 2.610970  | -3.778265 |
| O 0  | 0.000000  | -2.610970 | -3.778265 |
| O 0  | 3.003610  | 0.000000  | -1.350105 |
| O 0  | -3.003610 | 0.000000  | -1.350105 |
| Rh 0 | 0.000000  | 0.000000  | 0.723375  |
| C 0  | 0.000000  | 1.924560  | 0.496325  |
| C 0  | 0.000000  | -1.924560 | 0.496325  |
| C 0  | 0.000000  | 0.000000  | 2.625035  |
| O 0  | 0.000000  | 3.071300  | 0.401115  |
| O 0  | 0.000000  | -3.071300 | 0.401115  |
| O 0  | 0.000000  | 0.000000  | 3.778265  |

**7S-2**

|      | 0         | 1         |           |
|------|-----------|-----------|-----------|
| Rh 0 | -0.251478 | 1.247951  | 0.000000  |
| Rh 0 | -0.390779 | -1.561556 | 0.000000  |
| C 0  | 1.285124  | -2.624801 | 0.000000  |
| O 0  | 2.190760  | -3.334332 | 0.000000  |
| C 0  | 0.209645  | -0.157454 | 1.453826  |
| O 0  | 0.638175  | -0.182087 | 2.547003  |
| C 0  | -1.536679 | -2.323281 | 1.429183  |
| O 0  | -2.190760 | -2.839984 | 2.221694  |
| C 0  | -0.565979 | 2.535277  | 1.421276  |
| O 0  | -0.757828 | 3.334332  | 2.225624  |
| C 0  | 0.209645  | -0.157454 | -1.453826 |
| O 0  | 0.638175  | -0.182087 | -2.547003 |
| C 0  | -1.536679 | -2.323281 | -1.429183 |
| O 0  | -2.190760 | -2.839984 | -2.221694 |
| C 0  | -0.565979 | 2.535277  | -1.421276 |
| O 0  | -0.757828 | 3.334332  | -2.225624 |

**7S-3**

| 0    | 1         |           |           |
|------|-----------|-----------|-----------|
| O 0  | 2.359140  | 0.401337  | 0.000000  |
| C 0  | 1.245958  | 0.723792  | 0.000000  |
| Rh 0 | -0.557690 | 1.426995  | 0.000000  |
| C 0  | -0.038255 | 3.294640  | 0.000000  |
| O 0  | 0.284373  | 4.400452  | 0.000000  |
| C 0  | -1.689916 | 1.506133  | 1.617010  |
| C 0  | -1.689916 | 1.506133  | -1.617010 |
| O 0  | -2.359140 | 1.667194  | 2.544150  |
| O 0  | -2.359140 | 1.667194  | -2.544150 |
| Rh 0 | -0.748024 | -1.357031 | 0.000000  |
| C 0  | -0.887399 | -3.251662 | 0.000000  |
| O 0  | -0.986130 | -4.400452 | 0.000000  |
| C 0  | -0.695349 | -1.246833 | 1.936241  |
| C 0  | -0.695349 | -1.246833 | -1.936241 |
| O 0  | -0.629302 | -1.257793 | 3.082990  |
| O 0  | -0.629302 | -1.257793 | -3.082990 |

**7S-4**

| 0    | 1         |           |           |
|------|-----------|-----------|-----------|
| O 0  | 0.000000  | 0.000000  | 1.841444  |
| C 0  | 0.000000  | 0.000000  | 0.682390  |
| Rh 0 | 0.000000  | 1.370519  | -1.007821 |
| Rh 0 | 0.000000  | -1.370519 | -1.007821 |
| C 0  | 0.000000  | 3.199650  | -0.434159 |
| C 0  | 0.000000  | -3.199650 | -0.434159 |
| O 0  | 0.000000  | 4.300205  | -0.090161 |
| O 0  | 0.000000  | -4.300205 | -0.090161 |
| C 0  | -1.874350 | 1.436197  | -1.533774 |
| C 0  | -1.874350 | -1.436197 | -1.533774 |
| C 0  | 1.874350  | 1.436197  | -1.533774 |
| C 0  | 1.874350  | -1.436197 | -1.533774 |
| O 0  | -2.968400 | 1.633084  | -1.841444 |
| O 0  | -2.968400 | -1.633084 | -1.841444 |
| O 0  | 2.968400  | 1.633084  | -1.841444 |
| O 0  | 2.968400  | -1.633084 | -1.841444 |

**7S-5**

| 0    | 1         |           |           |
|------|-----------|-----------|-----------|
| O 0  | 0.000000  | 0.000000  | 2.971555  |
| C 0  | 0.000000  | 0.000000  | 1.794765  |
| Rh 0 | 0.000000  | 1.306510  | 0.178825  |
| Rh 0 | 0.000000  | -1.306510 | 0.178825  |
| C 0  | 1.406720  | 2.495780  | 0.740985  |
| C 0  | -1.406720 | 2.495780  | 0.740985  |
| C 0  | -1.406720 | -2.495780 | 0.740985  |
| C 0  | 1.406720  | -2.495780 | 0.740985  |
| C 0  | 0.000000  | 1.466650  | -1.844655 |
| C 0  | 0.000000  | -1.466650 | -1.844655 |
| O 0  | 2.281100  | 3.166930  | 1.076065  |
| O 0  | -2.281100 | 3.166930  | 1.076065  |
| O 0  | -2.281100 | -3.166930 | 1.076065  |
| O 0  | 2.281100  | -3.166930 | 1.076065  |
| O 0  | 0.000000  | 1.702920  | -2.971555 |
| O 0  | 0.000000  | -1.702920 | -2.971555 |

**7T-1**

|    |   |           |           |           |
|----|---|-----------|-----------|-----------|
| 0  | 3 |           |           |           |
| O  | 0 | 2.971698  | -0.182059 | 0.000000  |
| C  | 0 | 1.797320  | -0.183750 | 0.000000  |
| Rh | 0 | 0.269192  | -1.648928 | 0.000000  |
| Rh | 0 | 0.203774  | 1.179315  | 0.000000  |
| C  | 0 | 0.626854  | -2.045074 | 1.880796  |
| C  | 0 | 0.626854  | -2.045074 | -1.880796 |
| C  | 0 | 0.797690  | 2.361731  | -1.423488 |
| C  | 0 | 0.797690  | 2.361731  | 1.423488  |
| C  | 0 | -1.485686 | -2.521841 | 0.000000  |
| C  | 0 | -1.821598 | 1.102010  | 0.000000  |
| O  | 0 | 0.798433  | -2.285413 | 2.995502  |
| O  | 0 | 0.798433  | -2.285413 | -2.995502 |
| O  | 0 | 1.136964  | 3.085427  | -2.254316 |
| O  | 0 | 1.136964  | 3.085427  | 2.254316  |
| O  | 0 | -2.490776 | -3.085427 | 0.000000  |
| O  | 0 | -2.971698 | 1.158406  | 0.000000  |

**7T-2**

|    |   |           |           |           |
|----|---|-----------|-----------|-----------|
| 0  | 3 |           |           |           |
| O  | 0 | 0.000000  | 0.000000  | 2.893462  |
| C  | 0 | 0.000000  | 0.000000  | 1.713685  |
| Rh | 0 | 0.000000  | 1.386193  | 0.160201  |
| Rh | 0 | 0.000000  | -1.386193 | 0.160201  |
| C  | 0 | 1.589075  | 2.307697  | 0.825696  |
| C  | 0 | -1.589075 | 2.307697  | 0.825696  |
| C  | 0 | -1.589075 | -2.307697 | 0.825696  |
| C  | 0 | 1.589075  | -2.307697 | 0.825696  |
| C  | 0 | 0.000000  | 1.894032  | -1.794865 |
| C  | 0 | 0.000000  | -1.894032 | -1.794865 |
| O  | 0 | 2.468010  | 2.924506  | 1.243368  |
| O  | 0 | -2.468010 | 2.924506  | 1.243368  |
| O  | 0 | -2.468010 | -2.924506 | 1.243368  |
| O  | 0 | 2.468010  | -2.924506 | 1.243368  |
| O  | 0 | 0.000000  | 2.236495  | -2.893462 |
| O  | 0 | 0.000000  | -2.236495 | -2.893462 |

**7T-3**

|    |   |           |           |           |
|----|---|-----------|-----------|-----------|
| 0  | 3 |           |           |           |
| Rh | 0 | -1.375643 | 0.000000  | -0.557666 |
| Rh | 0 | 1.375643  | 0.000000  | -0.557666 |
| C  | 0 | 0.000000  | 0.000000  | 1.064864  |
| C  | 0 | -2.568179 | 1.484834  | -0.036875 |
| C  | 0 | -2.568179 | -1.484834 | -0.036875 |
| C  | 0 | 2.568179  | -1.484834 | -0.036875 |
| C  | 0 | 2.568179  | 1.484834  | -0.036875 |
| C  | 0 | 0.000000  | 1.293869  | -1.514064 |
| C  | 0 | 0.000000  | -1.293869 | -1.514064 |
| O  | 0 | 0.000000  | 0.000000  | 2.229134  |
| O  | 0 | -3.338441 | 2.315604  | 0.164255  |
| O  | 0 | -3.338441 | -2.315604 | 0.164255  |
| O  | 0 | 3.338441  | -2.315604 | 0.164255  |
| O  | 0 | 3.338441  | 2.315604  | 0.164255  |
| O  | 0 | 0.000000  | 2.234636  | -2.229134 |
| O  | 0 | 0.000000  | -2.234636 | -2.229134 |

**6S-1**

|      |           |           |           |
|------|-----------|-----------|-----------|
| 0    | 1         |           |           |
| Rh 0 | -1.373768 | 0.000000  | 0.000000  |
| Rh 0 | 1.373768  | 0.000000  | 0.000000  |
| C 0  | 0.000000  | 0.000000  | 1.524287  |
| C 0  | 0.000000  | 0.000000  | -1.524287 |
| C 0  | -2.663292 | 0.984336  | 1.070508  |
| C 0  | -2.663292 | -0.984336 | -1.070508 |
| C 0  | 2.663292  | -0.984336 | 1.070508  |
| C 0  | 2.663292  | 0.984336  | -1.070508 |
| O 0  | 0.000000  | 0.000000  | 2.698378  |
| O 0  | 0.000000  | 0.000000  | -2.698378 |
| O 0  | -3.439609 | 1.644755  | 1.604030  |
| O 0  | -3.439609 | -1.644755 | -1.604030 |
| O 0  | 3.439609  | -1.644755 | 1.604030  |
| O 0  | 3.439609  | 1.644755  | -1.604030 |

**6S-2**

|      |           |           |           |
|------|-----------|-----------|-----------|
| 0    | 1         |           |           |
| Rh 0 | 0.000000  | 0.000000  | -1.343135 |
| Rh 0 | 0.000000  | 0.000000  | 1.343135  |
| C 0  | 0.000000  | 0.000000  | -3.265850 |
| C 0  | 0.000000  | 0.000000  | 3.265850  |
| C 0  | 1.911031  | 0.000000  | -1.059847 |
| C 0  | -1.911031 | 0.000000  | -1.059847 |
| C 0  | 0.000000  | 1.911031  | 1.059847  |
| C 0  | 0.000000  | -1.911031 | 1.059847  |
| O 0  | 0.000000  | 0.000000  | -4.419263 |
| O 0  | 0.000000  | 0.000000  | 4.419263  |
| O 0  | 3.054455  | 0.000000  | -0.916757 |
| O 0  | -3.054455 | 0.000000  | -0.916757 |
| O 0  | 0.000000  | 3.054455  | 0.916757  |
| O 0  | 0.000000  | -3.054455 | 0.916757  |

**6S-3**

|      |           |           |           |
|------|-----------|-----------|-----------|
| 0    | 1         |           |           |
| Rh 0 | -1.269988 | 0.000000  | 0.000000  |
| Rh 0 | 1.269988  | 0.000000  | 0.000000  |
| C 0  | 0.000000  | 0.000000  | 1.705131  |
| C 0  | 0.000000  | 0.000000  | -1.705131 |
| C 0  | -2.584791 | 1.381452  | 0.000000  |
| C 0  | -2.584791 | -1.381452 | 0.000000  |
| C 0  | 2.584791  | -1.381452 | 0.000000  |
| C 0  | 2.584791  | 1.381452  | 0.000000  |
| O 0  | 0.000000  | 0.000000  | 2.866738  |
| O 0  | 0.000000  | 0.000000  | -2.866738 |
| O 0  | -3.355053 | 2.240499  | 0.000000  |
| O 0  | -3.355053 | -2.240499 | 0.000000  |
| O 0  | 3.355053  | -2.240499 | 0.000000  |
| O 0  | 3.355053  | 2.240499  | 0.000000  |

**6S-4**

|      |           |          |           |
|------|-----------|----------|-----------|
| 0    | 1         |          |           |
| Rh 0 | 0.000000  | 0.000000 | -1.442582 |
| C 0  | 0.000000  | 0.000000 | -3.341078 |
| C 0  | 1.931235  | 0.000000 | -1.370097 |
| C 0  | -1.931235 | 0.000000 | -1.370097 |
| O 0  | 0.000000  | 0.000000 | -4.495049 |
| O 0  | 3.074233  | 0.000000 | -1.520063 |
| O 0  | -3.074233 | 0.000000 | -1.520063 |
| Rh 0 | 0.000000  | 0.000000 | 1.442582  |
| C 0  | 0.000000  | 0.000000 | 3.341078  |
| C 0  | 1.931235  | 0.000000 | 1.370097  |
| C 0  | -1.931235 | 0.000000 | 1.370097  |
| O 0  | 0.000000  | 0.000000 | 4.495049  |
| O 0  | 3.074233  | 0.000000 | 1.520063  |
| O 0  | -3.074233 | 0.000000 | 1.520063  |

**6T-1**

|      |           |           |           |
|------|-----------|-----------|-----------|
| 0    | 3         |           |           |
| Rh 0 | 0.000000  | 0.000000  | -1.365154 |
| Rh 0 | 0.000000  | 0.000000  | 1.365153  |
| C 0  | -1.499365 | -0.482854 | 0.000000  |
| C 0  | 1.499365  | 0.482854  | 0.000000  |
| C 0  | 0.297976  | 1.432139  | -2.647942 |
| C 0  | -0.297976 | -1.432139 | -2.647942 |
| C 0  | -0.297976 | -1.432139 | 2.647942  |
| C 0  | 0.297976  | 1.432139  | 2.647942  |
| O 0  | -2.615545 | -0.830401 | 0.000000  |
| O 0  | 2.615545  | 0.830401  | 0.000000  |
| O 0  | 0.404662  | 2.262865  | -3.439852 |
| O 0  | -0.404662 | -2.262865 | -3.439852 |
| O 0  | -0.404662 | -2.262865 | 3.439852  |
| O 0  | 0.404662  | 2.262865  | 3.439852  |

**6T-2**

|      |           |           |           |
|------|-----------|-----------|-----------|
| 0    | 3         |           |           |
| Rh 0 | -1.369250 | 0.000000  | 0.000000  |
| Rh 0 | 1.369250  | 0.000000  | 0.000000  |
| C 0  | 0.000000  | 0.000000  | 1.520400  |
| C 0  | 0.000000  | 0.000000  | -1.520400 |
| C 0  | -2.534090 | 1.604600  | 0.000000  |
| C 0  | -2.534090 | -1.604600 | 0.000000  |
| C 0  | 2.534090  | -1.604600 | 0.000000  |
| C 0  | 2.534090  | 1.604600  | 0.000000  |
| O 0  | 0.000000  | 0.000000  | 2.691650  |
| O 0  | 0.000000  | 0.000000  | -2.691650 |
| O 0  | -3.205440 | 2.540110  | 0.000000  |
| O 0  | -3.205440 | -2.540110 | 0.000000  |
| O 0  | 3.205440  | -2.540110 | 0.000000  |
| O 0  | 3.205440  | 2.540110  | 0.000000  |

**6T-3**

|      |           |           |           |
|------|-----------|-----------|-----------|
| 0    | 3         |           |           |
| Rh 0 | 0.739580  | 0.076735  | 0.000000  |
| C 0  | 1.122730  | -1.822745 | 0.000000  |
| C 0  | -0.068910 | 1.845015  | 0.000000  |
| C 0  | 2.540320  | 0.672485  | 0.000000  |
| O 0  | 1.444480  | -2.930955 | 0.000000  |
| O 0  | -0.454650 | 2.930955  | 0.000000  |
| O 0  | 3.638780  | 1.028575  | 0.000000  |
| Rh 0 | -1.812030 | -1.010515 | 0.000000  |
| C 0  | -2.921910 | 0.549845  | 0.000000  |
| C 0  | -1.808870 | -1.338705 | 1.937520  |
| C 0  | -1.808870 | -1.338705 | -1.937520 |
| O 0  | -3.638780 | 1.455905  | 0.000000  |
| O 0  | -1.808870 | -1.410065 | 3.089220  |
| O 0  | -1.808870 | -1.410065 | -3.089220 |

**5S-1**

|      |           |           |           |
|------|-----------|-----------|-----------|
| 0    | 1         |           |           |
| O 0  | 0.000000  | 0.000000  | -1.577107 |
| C 0  | 0.000000  | 0.000000  | -0.408454 |
| Rh 0 | 1.248360  | 0.000000  | 1.230058  |
| Rh 0 | -1.248360 | 0.000000  | 1.230058  |
| C 0  | 2.479970  | 1.440135  | 1.469278  |
| C 0  | 2.479970  | -1.440135 | 1.469278  |
| C 0  | -2.479970 | -1.440135 | 1.469278  |
| C 0  | -2.479970 | 1.440135  | 1.469278  |
| O 0  | 3.206901  | 2.329447  | 1.577107  |
| O 0  | 3.206901  | -2.329447 | 1.577107  |
| O 0  | -3.206901 | -2.329447 | 1.577107  |
| O 0  | -3.206901 | 2.329447  | 1.577107  |

**5T-1**

|      |           |           |           |
|------|-----------|-----------|-----------|
| 0    | 3         |           |           |
| Rh 0 | 0.000874  | 1.343001  | -0.691953 |
| Rh 0 | -0.000874 | -1.343001 | -0.691953 |
| C 0  | 0.000000  | 0.000000  | 0.868219  |
| C 0  | -1.660034 | 1.021491  | -1.574148 |
| C 0  | 1.660034  | -1.021491 | -1.574148 |
| C 0  | 0.013441  | 3.205976  | -0.101476 |
| C 0  | -0.013441 | -3.205976 | -0.101476 |
| O 0  | 0.000000  | 0.000000  | 2.040302  |
| O 0  | -2.711483 | 0.899274  | -2.040302 |
| O 0  | 2.711483  | -0.899274 | -2.040302 |
| O 0  | -0.147099 | 4.284213  | 0.276537  |
| O 0  | 0.147099  | -4.284213 | 0.276537  |

**5T-2**

|      | 0         | 1         |           |  |
|------|-----------|-----------|-----------|--|
| Rh 0 | -0.716659 | 0.000000  | 1.276551  |  |
| Rh 0 | -0.716659 | 0.000000  | -1.276551 |  |
| C 0  | 0.936937  | 0.000000  | 0.000000  |  |
| C 0  | -1.534807 | -1.437997 | 0.000000  |  |
| C 0  | -1.534807 | 1.437997  | 0.000000  |  |
| C 0  | -0.625420 | 0.000000  | 3.252443  |  |
| C 0  | -0.625420 | 0.000000  | -3.252443 |  |
| O 0  | 2.104486  | 0.000000  | 0.000000  |  |
| O 0  | -2.104486 | -2.456409 | 0.000000  |  |
| O 0  | -2.104486 | 2.456409  | 0.000000  |  |
| O 0  | -0.563466 | 0.000000  | 4.402497  |  |
| O 0  | -0.563466 | 0.000000  | -4.402497 |  |

**Complete Gaussian 03 reference (Reference 39)**

Frisch, M. J.; Trucks, G. W.; Schlegel, H. B.; Scuseria, G. E.; Robb, M. A.; Cheeseman, J. R.; Montgomery, Jr., J. A.; Vreven, T.; Kudin, K. N.; Burant, J. C.; Millam, J. M.; Iyengar, S. S.; Tomasi, J.; Barone, V.; Mennucci, B.; Cossi, M.; Scalmani, G.; Rega, N.; Petersson, G. A.; Nakatsuji, H.; Hada, M.; Ehara, M.; Toyota, K.; Fukuda, R.; Hasegawa, J.; Ishida, M.; Nakajima, T.; Honda, Y.; Kitao, O.; Nakai, H.; Klene, M.; Li, X.; Knox, J. E.; Hratchian, H. P.; Cross, J. B.; Bakken, V.; Adamo, C.; Jaramillo, J.; Gomperts, R.; Stratmann, R. E.; Yazyev, O.; Austin, A. J.; Cammi, R.; Pomelli, C.; Ochterski, J. W.; Ayala, P. Y.; Morokuma, K.; Voth, G. A.; Salvador, P.; Dannenberg, J. J.; Zakrzewski, V. G.; Dapprich, S.; Daniels, A. D.; Strain, M. C.; Farkas, O.; Malick, D. K.; Rabuck, A. D.; Raghavachari, K.; Foresman, J. B.; Ortiz, J. V.; Cui, Q.; Baboul, A. G.; Clifford, S.; Cioslowski, J.; Stefanov, B. B.; Liu, G.; Liashenko, A.; Piskorz, P.; Komaromi, I.; Martin, R. L.; Fox, D. J.; Keith, T.; Al-Laham, M. A.; Peng, C. Y.; Nanayakkara, A.; Challacombe, M.; Gill, P. M. W.; Johnson, B.; Chen, W.; Wong, M. W.; Gonzalez, C.; and Pople, J. A. Gaussian 03, Revision C.02; Gaussian, Inc., Wallingford CT, **2004**.

**Complete MOLPRO reference (Reference 42)**

MOLPRO, version 2006.1, Werner, H.-J.; Knowles, P. J.; Lindh, R.; Manby, F. R.; Schütz, M.; Celani, P.; Korona, T.; Mitrushenkov, A.; Rauhut, G.; Adler, T. B.; Amos, R. D.; Bernhardsson, A.; Berning, A.; Cooper, D. L.; Deegan, M. J. O.; Dobbyn, A. J.; Eckert, F.; Goll, E.; Hampel, C.; Hetzer, G.; Hrenar, T.; Knizia, G.; Köppl, C.; Liu, Y.; Lloyd, A. W.; Mata, R. A.; May, A. J.; McNicholas, S. J.; Meyer, W.; Mura, M. E.; Nicklaß, A.; Palmieri, P.; Pflüger, K.; Pitzer, R.; Reiher, M.; Schumann, U.; Stoll, H.; Stone, A. J.; Tarroni, R.; Thorsteinsson, T.; Wang, M.; Wolf, A.
